# Supplementary material
Source: PubMed Central journal article supplement (PMC3801013)
Supplement: 1315934110_pnas.201315934SI.pdf [file 1315934110_pnas.201315934SI.pdf]

# Supporting Information

Gonzalez-Garay et al. 10.1073/pnas.1315934110

## SI Materials and Methods

**Cohort Description.** The cohort consists of members and spouses in the Houston Chapter of the Young Presidents Organization (YPO). Criteria for membership into the YPO includes corporate and community leadership (1). This cohort is well educated and of higher socioeconomic status. All 450 YPO members were invited to attend an 8-h educational program incorporating technology, human genetics, anticipated outcomes, ethical considerations, discussion groups, and technology demonstrations and printed materials. Of the 150 attendees, 81 volunteered to participate in this study: 46 men and 35 women, with an average age of 54 y. All 81 elected under the terms of the University of Texas Health Science Center at Houston's institutional review board to receive "need to know" genomic disease risk results. Each volunteer provided a detailed medical and drug use history reviewed by our physician-researcher (C.T.C.). A three-generation medical pedigree was acquired on each volunteer. One volunteer could provide no family history.

**Whole exome sequencing (WES) Sequencing.** Genomic DNA was extracted using a DNA kit (Promega wizard genomic DNA purification kit) following Promega's instructions (2). The cohort was sequenced twice: the first whole exome sequencing experiment (2011) was performed using Illumina's HiSeq and the Genome Analyzer Ix system (3) after enrichment with Nimblegen V2 kit (44 Mb) (4) (outsourced to the national center for genome resources). Our second WES experiment (2013) was performed using Illumina's newest machines HiSeq. 2500 (3) after enrichment with Agilent SureSelect target enrichment V5+UTRs (targeting coding regions plus UTRs) (5) (outsourced to Axseq Technologies). Genome sequencing of a small subset (24 subjects) for validation purposes was carried out by Complete Genomics Inc. (CGI) (6).

**Sequencing Analysis.** Our analysis pipeline consists of Novoalign (7), Samtools (8), Picard (9), and The Genome Analysis Toolkit (GATK) (10), followed by variant annotation (11–14) using multiple databases from the University of California Santa Cruz (UCSC) Genome bioinformatics site (15). Fig. 1 illustrates our pipeline. Fig. 2 describes our pipeline to detect known pathogenic variations. We detected known variants associated with human diseases using the Human Genome Mutation Database (HGMD) database from Biobase (16, 17) and genes known to be associated with human disorders from Online Mendelian Inheritance in Man (OMIM) (18, 19) and GeneTests (20). Functional effects of each nonsynonymous coding variant were evaluated using three different functional prediction algorithms [Polyphen 2.0 (21), Sift (22–27), and MutationTaster (28)] using the Database of Human Non-synonymous SNVs and their functional predictions and annotations (dbNSFP) (29). Filtration of common polymorphisms was accomplished using frequencies from the National Heart, Lung, and Blood Institute (NHLBI) exome sequencing project (ESP) (30), 1,000 Genomes (31, 32), and internally by removing any variant that appeared more than three times in our cohort. In addition, a group of candidate genes was obtained from OMIM (18, 19) for each volunteer after a careful analysis of the family and personal health history of each volunteer. Variations in those OMIM (18, 19) candidate genes were identified and submitted to the same frequency and functional effects filter as described before.

**Variant Validation.** Every variant identified in our pipeline was evaluated for quality control, and the variant's read alignments in

the BAM file [Binary version of a SAM (Sequencing Alignment Map) file] file were visualized using Integrative Genomics Viewer (IGV) (33). The purpose of this step was to try to remove the remaining false positives.

Each genetic variant was validated using the following steps: (i) retrieve reads over variant sites for each individual; (ii) make SamTools (8) genotype calls (an alternate calling algorithm); (iii) retrieve quality scores for all reads; (iv) keep track of the directional depth and require at least two variant reads in the 5' and 3' orientation for a variant to be considered true; and (v) filter out variants if the SamTools (8) genotype call disagrees with the GATK (10) call or if the quality scores or directional depth values do not exceed minimum values.

## Establishing Criteria for Highly Reliable Variant Calling from Exome Sequencing.

Our first objective was to define the methods needed to identify a set of "highly reliable" variants from the Illumina sequencing and apply these methods to variant calling on all of our samples. To meet our definition of a highly reliable variant, each variant had to be detected under two independent orthogonal sequencing technologies and been considered as high quality. Because there is not a common definition of what a high-quality variant is, we decided to take advantage of the confidence category scores provided from complete genomics; variants with a score of VQHIGH are considered high quality (masterVarbeta files version 2.0) and develop an equivalent value in our illumina sequencing data. To accomplish our first objective, a dataset of variants was generated from a set of 24 samples that we sequenced using Illumina (3) and an orthogonal sequencing technology (CGI) (6). CGI has their own proprietary workflow from alignment to data annotation (34). Fig. 1 describes our analysis workflow for exome sequencing data. Fig. S24 shows the intersection between the nonsynonymous coding variants (NSCVs) detected by CGI (6) and Illumina (3) exome sequencing. We extracted variants from CGI with a score of VQHIGH and that were also detected in the corresponding illumina's vcf file (Fig. S2B). This subset of highly reliable variants represents an average of 72% of the variants detected by CGI. By using our dataset, we were able to systematically test for conditions and software setting in our pipeline that generate the majority of the highly reliable variants and reduce the probability of selecting variants not present in our dataset. We reached the conclusions that by using two variant callers tools, GATK UnifiedGenotyper and mpileup/bcftools (samtools), and selecting an overlapping set of variants, we obtained variants of the highest quality. In addition, a postcalling filter enforces that each variant has to have a mapping quality >30, a base quality >20, and a coverage  $\geq 10$ , with at least a 3:7 ratio of variant to reference (Het) and the presence of the variant in reads from both orientations. By using these postcalling filters, we eliminated the majority of false-positive calls (FP).

**Counseling.** Genome counseling was conducted by a board-certified internist and a medical geneticist by both individual meetings and two written summaries over a period of 12 mo. The summary reports were prepared and jointly endorsed by a bioinformatician and a physician. Additional counseling was conducted by phone calls and appointments with their physician as requested by the volunteers.

**Counseling of Results.** Both causative and problematic alleles were reported verbally and in two written reports over an 18-mo period.

The first comprehensive report was updated ~1 y after (i) larger control databases downgraded some problematic alleles with more than a 1% frequency; (ii) private consultation with disease experts; and (iii) validation with original publications and small disease center databases. Several new disease–gene associations were discovered for the reported familial diseases found by pedigree and personal medical histories. Volunteers were informed that these were research results and instructed to consult with their personal physician so that they could have the results validated in a Clinical Laboratory Improvement Amendments (CLIA)-certified laboratory. Volunteers whose family members warranted genetic study were referred to the Baylor College of Medicine genetics program as a medical referral because this function was outside the institutional review board scope and Baylor College of Medicine offered both clinical genetic and CLIA Laboratory expertise. Our study preceded the publication of the incidental findings guidelines in clinical WES and whole genome sequencing (WGS) of the American College of Medical Genetics and Genomics (ACMG) (35). However, we have reviewed their list of 57 genes and 24 actionable conditions, and we found that we included all their genes in our analysis.

### Poststudy Survey

We conducted an online survey to assess volunteers' experiences of participating in this project under a Baylor College of Medicine institutional review board. The survey consisted of 82 items and focused on how the volunteers felt about taking part in the research project, as well as their perspectives on genetic information in health care and genomic research in general. Study participants were told the survey was completely voluntary and that they could skip any question they preferred not to answer and could end their participation at any time.

All 81 study volunteers were invited via e-mail to participate in the anonymous online survey within 12 mo after receiving their individual genome reports. Forty-two participants responded to the online survey (response rate, 51.9%; 38 responses were complete). Of those who responded, 59% were men, 41% were women, and 95% had biological children. Ninety-seven percent described their race as white, and 5% chose "other" (participants could choose all that applied); 5% also identified themselves as Hispanic or Latino. All participants had earned a college degree, and 63% had completed at least some graduate work. All participants reported having had a routine medical check-up within the last 2 y, and when asked how they would rate their health, 58% reported excellent, 29% reported very good, 11% reported good, and 3% reported fair.

**Poststudy survey results.** This study had as its objective to deliver helpful medical genetic information. The mandatory education program informed volunteers that unexpected risks were to be expected. Our institutional review board required volunteers to have the options of declining this information. None chose that option.

The results of the anonymous online survey showed that, overall, participants were motivated to take part in the project to receive their genetic results and learn about their personal risk of disease. Seventy-nine percent of respondents reported that the opportunity to receive their personal genetic results was the most important factor in their decision to take part in the project, whereas another 10% cited a personal interest in genetics in general. When asked to choose which factor was most important in their decision to receive their personal genetic results, most respondents (52%) reported that their interest in finding out their personal risk for diseases was the most important factor; other important factors included the desire to get information about risk of health conditions for their children (17%), the desire to learn more about the medical conditions in their family (10%), and curiosity about their genetic makeup (10%).

Ninety-seven percent of respondents agreed or strongly agreed that they were glad that they decided to participate in this study and receive their personal results, leaving only 3% undecided. Most respondents (72%) spoke with their primary care provider about their results, and 50% reported that they spoke with other medical professionals, including cardiologists, oncologists, and obstetricians/gynecologists, among others; 22% reported that they had their twice-confirmed research results confirmed in a CLIA-certified laboratory.

Twenty-five percent of respondents reported that the test results motivated them to make changes to their health care (i.e., undergoing tests, seeing a specialist, taking vitamins or herbal supplements), exercise, medications, or insurance (Table S11).

Respondents generally felt that researchers should offer personalized results to research participants: 54% felt that researchers are obligated to offer results, 22% felt that researchers are obligated to offer results only if the researcher is a physician, and the remaining 24% did not think researchers were obligated to offer results. Respondents were pleased with the methods by which they were given their results in this study, with 95% agreeing or strongly agreeing that they were glad the researchers sent them a personalized results report, and 100% agreeing or strongly agreeing that they found the in-person consultation about their results very helpful. When asked, 94% said they would also want an electronic record of their entire genome if it were available.

When asked about genetic testing in health care, 83% reported that they felt that genetic testing should be a regular part of health care and 97% agreed or strongly agreed that they felt comfortable using these results to make decisions about their health. Nevertheless, respondents were evenly split when asked if they thought these results should be part of their medical record.

In summary, our poststudy surveys indicated that volunteers were motivated to gain personal and family health knowledge, satisfied with the translation of the genetic information, and had a divided opinion about incorporating their genetic information into their medical records.

- Anonymous Membership criteria YPO. Available at <http://www.ypo.org/join-ypo/>. Accessed September 19, 2013.
- Anonymous Wizard. Available at <http://www.promega.com/resources/protocols/technical-manuals/0awizard-genomic-dna-purification-kit-protocol/>. Accessed September 19, 2013.
- Anonymous Illumina. Available at <http://www.illumina.com>. Accessed September 19, 2013.
- Anonymous NimbleGen Roche. Available at <http://www.nimblegen.com/products/seqcap/ez/v2/index.html>. Accessed September 19, 2013.
- Agilent Technologies Agilent SureSelect array. Available at <http://www.genomics.agilent.com/en/Exome-Sequencing/SureSelect-Human-All-Exon-Kits?cid=cat240002&tabId=AG-PR-1204>. Accessed September 19, 2013.
- Anonymous Complete Genomics Inc. Available at <http://www.completegenomics.com>. Accessed September 19, 2013.
- Novocraft.com (2012) Available at <http://www.novocraft.com>. Accessed September 19, 2013.
- SAMtools. Available at <http://samtools.sourceforge.net/>. Accessed September 19, 2013.
- Picard. Available at <http://picard.sourceforge.net/>. Accessed September 19, 2013.
- McKenna A, et al. (2010) The Genome Analysis Toolkit: A MapReduce framework for analyzing next-generation DNA sequencing data. *Genome Res* 20(9):1297–1303.
- Cingolani P snpEff: SNP effect predictor. Available at <http://snpeff.sourceforge.net/>. Accessed September 19, 2013.
- Cingolani P, et al. (2012) A program for annotating and predicting the effects of single nucleotide polymorphisms, SnpEff: SNPs in the genome of *Drosophila melanogaster* strain w1118; iso-2; iso-3. *Fly (Austin)* 6(2):80–92.
- San Lucas FA, Wang G, Scheet P, Peng B (2012) Integrated annotation and analysis of genetic variants from next-generation sequencing studies with variant tools. *Bioinformatics* 28(3):421–422.
- Wang K, Li M, Hakonarson H (2010) ANNOVAR: functional annotation of genetic variants from high-throughput sequencing data. *Nucleic Acids Res* 38(16):e164.
- Kuhn RM, Haussler D, Kent WJ (2013) The UCSC genome browser and associated tools. *Brief Bioinform* 14(2):144–161.
- Stenson PD, et al. (2012) The Human Gene Mutation Database (HGMD) and its exploitation in the fields of personalized genomics and molecular evolution. *Curr Protocol Bioinform*.
- Stenson PD, et al. (2009) The Human Gene Mutation Database: 2008 update. *Genome Med* 1(1):13.



**Table S1. Disease associations with alleles**

| Case | Disease                                              | Risk gene       | Allele          | HGMD     | OMIM gene ID |
|------|------------------------------------------------------|-----------------|-----------------|----------|--------------|
| 3937 | Hypercholesterolaemia                                | <i>LDLR</i>     | p.P526H         | CM100938 | 606945       |
| 3890 | Hypercholesterolaemia                                | <i>LDLR</i>     | p.T726I         | CM920469 | 606945       |
| 3910 | Hypercholesterolaemia                                | <i>LDLR</i>     | p.T726I         | CM920469 | 606945       |
| 3900 | Hypercholesterolaemia                                | <i>LDLR</i>     | p.V827I         | CM920471 | 606945       |
| 3915 | Hypercholesterolaemia                                | <i>LDLR</i>     | p.V827I         | CM920471 | 606945       |
| 3923 | Obesity                                              | <i>MC4R</i>     | p.I251L         | CM030483 | 155541       |
| 3923 | Diabetes mellitus, type II                           | <i>MAPK8IP1</i> | p.D386E         | NA       | 604641       |
| 3973 | Obesity                                              | <i>MC4R</i>     | p.C326R         | CM070992 | 155541       |
| 3937 | Diabetes mellitus type 2 (MODY)                      | <i>FN3K</i>     | p.H146R         | NA       | 608425       |
| 3937 | Diabetes mellitus type 2 (MODY)                      | <i>PASK</i>     | p.P1256L        | NA       | 607505       |
| 3923 | Macular degeneration, age related                    | <i>ABCA4</i>    | p.G863A         | CM970003 | 601691       |
| 3898 | Brittle cornea syndrome type 1<br>(BCS1) keratoconus | <i>ZNF469</i>   | p.D2902Y        | NA       | 612078       |
| 3889 | Male infertility                                     | <i>USP26</i>    | p.T123_Q124insT | NA       | 300309       |
| 3942 | Melanoma                                             | <i>BAG4</i>     | p.W103X         | NA       | 603884       |
| 3959 | Melanoma                                             | <i>GRIN2A</i>   | p.N1076K        | NA       | 138253       |
| 3896 | Breast or ovarian cancer                             | <i>BRCA2</i>    | p.I505T         | CM010167 | 600185       |
| 3959 | Breast or ovarian cancer                             | <i>BRCA2</i>    | p.S384F         | CM065036 | 600185       |
| 3897 | Breast or ovarian cancer                             | <i>BRCA2</i>    | p.T2515I        | CM994287 | 600185       |
| 3950 | Follicular thyroid cancer (age 41)                   | <i>TPR</i>      | p.R105C         | NA       | 189940       |
| 3960 | Prostate cancer                                      | <i>LRP2</i>     | P.N479H         | NA       | 600073       |
| 3960 | Prostate cancer                                      | <i>LRP2</i>     | P.G4417D        | NA       | 600073       |
| 3934 | Nonsyndromic deafness                                | <i>MYH14</i>    | p.M161I         | NA       | 608568       |
| 3934 | Nonsyndromic deafness                                | <i>SLC17A8</i>  | p.R75C          | NA       | 607557       |

NA, not available.

**Table S2. Familial diseases and associations**

| Case | Disorder               | Gene           | Volunteer relatedness | Association |                   |
|------|------------------------|----------------|-----------------------|-------------|-------------------|
|      |                        |                |                       | Volunteer   | Affected relative |
| 3949 | Praeder Willie         | <i>MAGEL2</i>  | 2°                    | —           | +                 |
| 3947 | Paraganglioma          | <i>SDHB</i>    | 1°                    | —           | +                 |
| 3930 | Ankylosing spondylitis | <i>HLA-B27</i> | 1°                    | —           | +                 |
| 3930 | Tourettes              | <i>TBD</i>     | 1°(3)                 | IP          | IP                |
| 3928 | Parkinson              | <i>LRRK2</i>   | 1°                    | —           | +                 |

—, negative; IP, research in progress.

**Table S3. Recessive disorders**

| Cases                              | Disease                                               | Risk gene       | Allele                     | HGMD                         | OMIM   |
|------------------------------------|-------------------------------------------------------|-----------------|----------------------------|------------------------------|--------|
| 3958                               | Niemann-Pick type C2 disease                          | <i>NPC2</i>     | p.N111K                    | CM081368                     | 601015 |
| 3896, 3900, 3915, 3895             | Antitrypsin $\alpha$ 1 deficiency                     | <i>SERPINA1</i> | p.R247C, p.E366K (3)       | CM910298, CM830003           | 107400 |
| 3894                               | Glycogen storage disease 0                            | <i>GYS2</i>     | p.Q183X                    | CM023388                     | 138571 |
| 3889                               | Glycogen storage disease 1a                           | <i>G6PC</i>     | p.R83C                     | CM930261                     | 613742 |
| 3901                               | Glycogen storage disease 3                            | <i>AGL</i>      | p.R477H                    | CM104343                     | 610860 |
| 3945                               | Glycogen storage disease 4                            | <i>GBE1</i>     | p.Y329S                    | CM960705                     | 607839 |
| 3898                               | Glycogen storage disease 6                            | <i>PYGL</i>     | p.D634H                    | CM078418                     | 613741 |
| 3941, 3952                         | Glycogen storage disease 9B                           | <i>PHKB</i>     | p.Q650K                    | CM031327                     | 172490 |
| 3915, 3919, 3943, 3954             | Fanconi anemia                                        | <i>FANCA</i>    | p.T126R, p.S858R (3)       | CM043494, CM992317           | 607139 |
| 3936, 3934                         | Familial Mediterranean fever                          | <i>MEFV</i>     | p.E148Q, p.P369S, p.R408Q  | CM981240, CM990837, CM990838 | 608107 |
| 395, 439, 243, 953                 | Cystic fibrosis                                       | <i>CFTR</i>     | p.D1152H, p.S1235R,        | CM950256, CM930133           | 602421 |
| 3933                               | Sandhoff disease                                      | <i>HEXB</i>     | p.A543T                    | CM970723                     | 606873 |
| 3940                               | Fuchs endothelial dystrophy                           | <i>ZEB1</i>     | p.Q824P                    | CM100242                     | 189909 |
| 3908                               | Factor V deficiency                                   | <i>F5</i>       | p.P1816S                   | CM095204                     | 612309 |
| 3952                               | Hepatic lipase deficiency                             | <i>LIPC</i>     | p.T405M                    | CM910258                     | 151670 |
| 3962                               | Krabbe disease                                        | <i>GALC</i>     | p.T112A                    | CM960678                     | 606890 |
| 3954                               | Macular corneal dystrophy, type 2                     | <i>CHST6</i>    | p.Q331H                    | CM055930                     | 605294 |
| 3891, 3947, 3959, 3924, 3895, 3897 | Usher syndrome 1d                                     | <i>CDH23</i>    | p.A366, p.D1806E, p.R1060W | CM050545, CM105104, CM021537 | 605516 |
| 3900, 3910                         | Phenylketonuria                                       | <i>PAH</i>      | p.A300S, p.R53H            | CM920555, CM981427           | 612349 |
| 3933, 3946                         | MCAD (medium-chain acyl-coA dehydrogenase deficiency) | <i>ACADM</i>    | p.K329E (2)                | CM900001                     | 607008 |
| 3914                               | Adrenal hyperplasia                                   | <i>HSD3B2</i>   | p.R249X                    | CM950655                     | 613890 |
| 3926                               | 17- $\alpha$ -hydroxylase/17,20-lyase deficiency      | <i>CYP17A1</i>  | p.R449C                    | HM0669                       | 609300 |

**Table S4. X-linked recessive**

| Case | Disorder                 | Risk gene   | Allele   | Sex    | HGMD     | OMIM   |
|------|--------------------------|-------------|----------|--------|----------|--------|
| 3891 | ATRX syndrome            | <i>ATRX</i> | p.N1860S | Female | CM950125 | 300032 |
| 3930 | Fabry disease            | <i>GLA</i>  | p.A143T  | Female | CM972773 | 300644 |
| 3901 | Mucopolysaccharidosis II | <i>IDS</i>  | p.D252N  | Female | CM960865 | 300823 |

**Table S5. Breast cancer risk**

| Case | Disease       | Risk gene     | Allele    | Family history                               | Sex    | Age (y) | HGMD      | OMIM gene ID |
|------|---------------|---------------|-----------|----------------------------------------------|--------|---------|-----------|--------------|
| 3959 | Breast cancer | <i>BRCA2</i>  | p.S384F   | Affected (44)                                | Female | 44      | CM065036  | 600185       |
| 3896 | Breast cancer | <i>BRCA2</i>  | p.I505T   | Affected                                     | Female | 49      | CM010167  | 600185       |
| 3955 | Breast cancer | <i>BRCA2</i>  | p.E1625fs | Negative                                     | Female | 42      | CD011121  | 600185       |
| 3962 | Breast cancer | <i>PALB2</i>  | p.V1103M  | First, second, third degree (2) (49–60s)     | Female | 51      | CM118272  | 610355       |
| 3936 | Breast cancer | <i>BRCA1</i>  | p.Y856H   | First degree (sister 40s)                    | Male   | 62      | CM042673  | 113705       |
| 3936 | Breast cancer | <i>BRCA2</i>  | p.K2729N  | First degree (sister 40s)                    | Male   | 62      | CM021957  | 600185       |
| 3963 | Breast cancer | <i>BRCA2</i>  | p.R2034C  | First degree (60s)                           | Male   | 48      | CM994286  | 600185       |
| 3897 | Breast cancer | <i>BRCA2</i>  | p.T2515I  | First degree (80)                            | Female | 51      | CM994287  | 600185       |
| 3934 | Breast cancer | <i>RAD51C</i> | p.T287A   | First degree (uterine)                       | Female | 50      | NA        | 602774       |
| 3939 | Breast cancer | <i>RAD50</i>  | p.R1069X  | First degree breast (60s)/second colon (60s) | Male   | 56      | NA        | 604040       |
| 3912 | Breast cancer | <i>RAD51C</i> | p.A126T   | Negative                                     | Male   | 77      | CM1010201 | 602774       |
| 3923 | Breast cancer | <i>RAD51C</i> | p.T287A   | Negative                                     | Male   | 60      | CM1010198 | 602774       |
| 3956 | Breast cancer | <i>RAD51C</i> | p.T287A   | Negative                                     | Male   | 59      | CM1010198 | 602774       |

NA, not available.

**Table S6. Colon cancer risk**

| Case | Disease      | Risk gene    | Allele   | Family history                 | Sex    | Age (y) | HGMD               | OMIM gene ID |
|------|--------------|--------------|----------|--------------------------------|--------|---------|--------------------|--------------|
| 3896 | Colon cancer | <i>MLH1</i>  | p.K618A  | First degree                   | Female | 49      | CM973729, CM950808 | 120436       |
| 3891 | Colon cancer | <i>MLH3</i>  | p.E1451K | First degree (70s)             | Female | 62      | CM013011           | 604395       |
| 3897 | Colon cancer | <i>APC</i>   | p.A2690T | First and second degree cancer | Female | 51      | CM045404           | 611731       |
| 3904 | Colon cancer | <i>MSH2</i>  | p.G315V  | Second degree                  | Male   | 49      | CM995220           | 609309       |
| 3897 | Colon cancer | <i>MSH2</i>  | p.G12D   | Negative                       | Female | 51      | CM950813           | 609309       |
| 3962 | Colon cancer | <i>APC</i>   | p.S2621C | Negative                       | Female | 51      | CM921028           | 611731       |
| 3955 | Colon cancer | <i>APC</i>   | p.R2505Q | Negative                       | Female | 42      | NA                 | 611731       |
| 3933 | Colon cancer | <i>MUTYH</i> | p.G382D  | Negative                       | Female | 69      | CM020287           | 604933       |

NA, not available.

**Table S7. Other cancer risk**

| Case | Disease                   | Risk gene     | Allele   | Family history        | Sex    | Age (y) | HGMD     | OMIM gene ID |
|------|---------------------------|---------------|----------|-----------------------|--------|---------|----------|--------------|
| 3959 | Melanoma                  | <i>GRIN2A</i> | p.N1076K | Affected              | Female | 44      | NA       | 138253       |
| 3942 | Melanoma                  | <i>BAG4</i>   | p.W103X  | Affected              | Male   | 70      | NA       | 603884       |
| 3950 | Follicular thyroid cancer | <i>TPR</i>    | p.R105C  | Affected              | Male   | 48      | NA       | 189940       |
| 3960 | Prostate cancer           | <i>LRP2</i>   | p.N479H  | Affected              | Male   | 65      | NA       | 600073       |
| 3946 | Prostate cancer           | <i>LRP2</i>   | p.M4601I | Negative              | Female | 59      | NA       | 600073       |
| 3957 | Prostate cancer           | <i>LRP2</i>   | p.N1797S | First degree (father) | Male   | 44      | NA       | 600073       |
| 3957 | Prostate cancer           | <i>DLC1</i>   | p.D89N   | First degree (father) | Male   | 44      | NA       | 604258       |
| 3932 | Prostate cancer           | <i>CHEK2</i>  | p.E64K   | Negative              | Male   | 47      | CM030414 | 604373       |
| 3935 | Prostate cancer           | <i>ELAC2</i>  | p.R781H  | Negative              | Female | 70      | CM010221 | 605367       |
| 3902 | Prostate cancer           | <i>MSR1</i>   | p.H441R  | Negative              | Female | 46      | CM023581 | 153622       |
| 3900 | Prostate cancer           | <i>MSR1</i>   | p.R293X  | Negative              | Male   | 45      | CM023579 | 153622       |
| 3954 | Prostate cancer           | <i>RNASEL</i> | p.E265X  | Negative              | Male   | 72      | CM020300 | 180435       |
| 3954 | Prostate cancer           | <i>RNASEL</i> | p.G59S   | Negative              | Male   | 72      | CM031342 | 180435       |
| 3963 | Retinoblastoma            | <i>RB1</i>    | p.R656W  | Negative              | Male   | 48      | CM030511 | 614041       |
| 3896 | Pituitary cancer          | <i>ACVRL1</i> | p.A482V  | Negative              | Female | 46      | CM994582 | 601284       |
| 3896 | Pituitary cancer          | <i>ACVRL1</i> | p.A482V  | Negative              | Female | 46      | CM994582 | 601284       |
| 3930 | Esophageal cancer         | <i>WWOX</i>   | p.G178S  | Negative              | Female | 52      | NA       | 605131       |
| 3973 | Esophageal cancer         | <i>WWOX</i>   | p.R120W  | Negative              | Male   | 71      | CM016224 | 605131       |
| 3916 | Esophageal cancer         | <i>WWOX</i>   | p.R120W  | Negative              | Male   | 70      | CM016224 | 605131       |
| 3941 | Gastric cancer            | <i>MET</i>    | p.A347T  | Negative              | Male   | 46      | NA       | 164860       |

NA, not available.

**Table S8. Cardiomyopathy-affected volunteers**

| Case | Disease                                            | Risk gene     | Allele   | Clinical                                                                                                | Age (y) | HGMD     | OMIM gene ID |
|------|----------------------------------------------------|---------------|----------|---------------------------------------------------------------------------------------------------------|---------|----------|--------------|
| 3925 | Dilated cardiomyopathy                             | <i>MYH6</i>   | p.A1443D | Atrial fibrillation                                                                                     | 65      | CM107536 | 160710       |
| 3926 | Cardiomyopathy<br>arrhythmogenic right ventricular | <i>DSG2</i>   | p.V158G  | Arrhythmia                                                                                              | 65      | CM070921 | 125671       |
| 3935 | Dilated cardiomyopathy                             | <i>MYH6</i>   | p.R1398Q | Cardiac dysrhythmia                                                                                     | 70      | NA       | 160710       |
| 3935 | Cardiomyopathy, dilated, 1EE                       | <i>MYH6</i>   | p.R1398Q | Cardiac dysrhythmia                                                                                     | 70      | NA       | 160710       |
| 3935 | Arrhythmogenic right<br>ventricular cardiomyopathy | <i>TTN</i>    | p.P3751R | Cardiac dysrhythmia                                                                                     | 70      | NA       | 188840       |
| 3955 | Dilated cardiomyopathy                             | <i>ACTN2</i>  | p.Q349L  | 1° pacemaker                                                                                            | 53      | NA       | 102573       |
| 3955 | Familial hypertrophic<br>cardiomyopathy 12         | <i>CSRP3</i>  | p.R100H  | 1° pacemaker                                                                                            | 53      | CM091458 | 600824       |
| 3916 | Dilated cardiomyopathy<br>type 1A                  | <i>LAMA2</i>  | p.T821M  | Stent placement                                                                                         | 71      | NA       | 156225       |
| 3887 | Cardiomyopathy, hypertrophic                       | <i>MYBPC3</i> | p.R326Q  | Stent placement (3)                                                                                     | 73      | CM020155 | 600958       |
| 3887 | Cardiomyopathy familial<br>hypertrophic (CMH)      | <i>MYLK2</i>  | p.V402F  | Stent placement (3)                                                                                     | 73      | NA       | 606566       |
| 3953 | Brugada syndrome<br>(arrhythmia)                   | <i>KCNE3</i>  | p.M65T   | Two bypass, stent,<br>and familial history of CAD                                                       | 71      | NA       | 604433       |
| 3953 | Arrhythmogenic right<br>ventricular cardiomyopathy | <i>TTN</i>    | p.P5237T | Two bypass, stent,<br>and familial history of CAD                                                       | 71      | NA       | 188840       |
| 3937 | Hypercholesterolaemia                              | <i>LDLR</i>   | p.P526H  | Three generations of early MI,<br>elevated LDL, cholesterol, triglycerides,<br>and treated with statins | 53      | CM100938 | 606945       |
| 3890 | Hypercholesterolaemia                              | <i>LDLR</i>   | p.T726I  | 1° early MI                                                                                             | 57      | CM920469 | 606945       |
| 3910 | Hypercholesterolaemia                              | <i>LDLR</i>   | p.T726I  | 1° aortic occlusion,<br>elevated cholesterol                                                            | 51      | CM920469 | 606945       |
| 3900 | Hypercholesterolaemia                              | <i>LDLR</i>   | p.V827I  | 1° early MI                                                                                             | 45      | CM920471 | 606945       |
| 3915 | Hypercholesterolaemia                              | <i>LDLR</i>   | p.V827I  | Three generations of elevated cholesterol,<br>treated with statins                                      | 70      | CM920471 | 606945       |

CAD, coronary artery disease; MI, myocardial infarction; NA, not available.

**Table S9. Cardiomyopathy unaffected but family history**

| Case | Disease                                                      | Risk gene    | Allele   | Clinical                          | Age (y) | HGMD     | OMIM gene ID |
|------|--------------------------------------------------------------|--------------|----------|-----------------------------------|---------|----------|--------------|
| 3943 | Arrhythmogenic right ventricular<br>cardiomyopathy           | <i>TTN</i>   | p.G1345D | Familial history of<br>arrhythmia | 44      | NA       | 188840       |
| 3896 | Dilated cardiomyopathy                                       | <i>SYNE1</i> | p.L3057V | Familial history                  | 45      | NA       | 608441       |
| 3896 | Arrhythmogenic right ventricular<br>dysplasia/cardiomyopathy | <i>JUP</i>   | p.V648I  | Familial history                  | 45      | NA       | 173325       |
| 3944 | Hypertrophic cardiomyopathy                                  | <i>OBSCN</i> | p.K1671N | Father                            | 45      | NA       | 608616       |
| 3931 | Dilated cardiomyopathy                                       | <i>MYH6</i>  | p.R1398Q | Familial history                  | 46      | NA       | 160710       |
| 3907 | Cardiomyopathy, hypertrophic                                 | <i>ACTN2</i> | p.T495M  | Father                            | 47      | CM101366 | 102573       |
| 3950 | Cardiomyopathy                                               | <i>MYOM1</i> | p.G1162S | Familial history                  | 48      | NA       | 603508       |
| 3919 | Romano-Ward syndrome (arrhythmia)                            | <i>SCN5A</i> | p.S1769N | Familial history                  | 51      | CM002391 | 600163       |
| 3889 | Romano-Ward syndrome (arrhythmia)                            | <i>SCN5A</i> | p.S1769N | Mother                            | 51      | CM002391 | 600163       |
| 3917 | Cardiomyopathy                                               | <i>MYOM1</i> | p.R1573Q | Familial history +<br>father      | 51      | NA       | 603508       |
| 3960 | Dilated cardiomyopathy                                       | <i>NEBL</i>  | p.K60N   | Son CAD                           | 66      | CM106905 | 605491       |
| 3976 | Cardiomyopathy                                               | <i>MYOM1</i> | p.E704K  | Older brother                     | 72      | NA       | 603508       |
| 3976 | Early onset myopathy                                         | <i>MYH2</i>  | p.V970I  | Older brother                     | 72      | CM051560 | 160740       |

**Table S10. Neurodegenerative risk**

| Case | Disease                                        | Risk gene     | Allele    | Family history         | Age (y) | HGMD     | OMIM   |
|------|------------------------------------------------|---------------|-----------|------------------------|---------|----------|--------|
| 3908 | Alzheimer's disease                            | <i>APOE</i>   | p.C130R   | Negative               | 44      | CM900020 | 107741 |
| 3916 | Alzheimer's disease                            | <i>APOE</i>   | p.L46P    | Parkinson 1° (72)      | 71      | CM990167 | 107741 |
| 3954 | Alzheimer's disease                            | <i>APP</i>    | p.R469H   | Negative               | 72      | NA       | 104760 |
| 3942 | Frontotemporal dementia                        | <i>MAPT</i>   | p.S427F   | Negative               | 71      | NA       | 157140 |
| 3954 | Frontotemporal dementia                        | <i>MAPT</i>   | p.V224G   | Negative               | 72      | NA       | 157140 |
| 3895 | Parkinson disease                              | <i>EIF4G1</i> | p.G686C   | Negative               | 49      | CM117028 | 600495 |
| 3916 | Parkinson disease                              | <i>EIF4G1</i> | p.R1205H  | Parkinson 1° (78)      | 64      | CM117009 | 600495 |
| 3951 | Parkinson disease                              | <i>EIF4G1</i> | p.S1596T  | Negative               | 64      | NA       | 600495 |
| 3931 | Parkinson disease 11                           | <i>GIGYF2</i> | p.P1222fs | Negative               | 44      | NA       | 612003 |
| 3946 | Parkinson disease 11                           | <i>GIGYF2</i> | p.H1171R  | Negative               | 59      | NA       | 612003 |
| 3957 | Parkinson disease 11                           | <i>GIGYF2</i> | p.M48I    | Negative               | 44      | NA       | 612003 |
| 3930 | Parkinson disease 11                           | <i>GIGYF2</i> | p.S1035C  | Negative               | 52      | NA       | 612003 |
| 3933 | Parkinson disease 11                           | <i>GIGYF2</i> | p.S1035C  | Negative               | 68      | NA       | 612003 |
| 3928 | Parkinson disease                              | <i>LRRK2</i>  | p.A419V   | Tremor 1° Parkinson 2° | 68      | CM125746 | 609007 |
| 3903 | Parkinson disease                              | <i>LRRK2</i>  | p.D972G   | Negative               | 54      | NA       | 609007 |
| 3919 | Parkinson disease                              | <i>LRRK2</i>  | p.D972G   | Negative               | 51      | NA       | 609007 |
| 3889 | Parkinson disease                              | <i>LRRK2</i>  | p.G2019S  | Negative               | 51      | CM050659 | 609007 |
| 3951 | Parkinson disease                              | <i>LRRK2</i>  | p.L119P   | Negative               | 50      | NA       | 609007 |
| 3918 | Parkinson disease                              | <i>LRRK2</i>  | p.L286V   | Negative               | 64      | NA       | 609007 |
| 3907 | Parkinson disease                              | <i>LRRK2</i>  | p.P1542S  | Alzheimer's 2°         | 47      | NA       | 609007 |
| 3935 | Parkinson disease                              | <i>LRRK2</i>  | p.P1542S  | Negative               | 70      | NA       | 609007 |
| 3893 | Parkinson disease                              | <i>LRRK2</i>  | p.R1514Q  | Negative               | 45      | CM057190 | 609007 |
| 3943 | Parkinson disease                              | <i>LRRK2</i>  | p.R1514Q  | Negative               | 50      | CM057190 | 609007 |
| 3949 | Parkinsonism, juvenile,<br>autosomal recessive | <i>PARK2</i>  | p.R275W   | 2° three siblings      | 52      | CM991007 | 602544 |
| 3924 | Parkinsonism, juvenile,<br>autosomal recessive | <i>PARK2</i>  | p.R334C   | Negative               | 54      | CM003865 | 602544 |
| 3927 | Parkinson                                      | <i>PM20D1</i> | p.A332V   | Negative               | 73      | NA       | 613164 |
| 3886 | Parkinson                                      | <i>PM20D1</i> | p.P281Q   | Negative               | 62      | NA       | 613164 |

**Table S11. Percentage of survey respondents reporting having made behavioral changes specifically motivated by their test results**

| Type of behavior change                                                  | Yes      | No       |
|--------------------------------------------------------------------------|----------|----------|
| Changes to diet                                                          | 4 (10%)  | 36 (90%) |
| Changes to health care (such as undergoing tests or seeing a specialist) | 4 (10%)  | 36 (90%) |
| Changes to use of vitamins/herbal supplements                            | 4 (10%)  | 36 (90%) |
| Changes to exercise                                                      | 3 (8%)   | 37 (92%) |
| Changes to medications                                                   | 1 (2%)   | 39 (98%) |
| Changes to insurance coverage                                            | 1 (2%)   | 39 (98%) |
| Number of respondents making at least one of the above behavior changes  | 10 (25%) |          |
